# Supplementary material
Source: PubMed Central journal article supplement (PMC4279102)
Supplement: supp_114.218131_jpet218131_suppl_figures.pdf [file supp_114.218131_jpet218131_suppl_figures.pdf]

**Title: M1 Polarization bias and subsequent NASH progression is attenuated by nitric oxide donor DETA NONOate via inhibition of CYP2E1 induced oxidative stress in obese mice**

Authors: Ratanesh Kumar Seth, Suvarthi Das, Sahar Pourhoseini, Diptadip Dattaroy, Stephen Igwe, Julie Basu Ray, Daping Fan, Gregory A. Michelotti, Anna Mae Diehl and Saurabh Chatterjee.

Journal Name: Journal of Pharmacology and Experimental Therapeutics

Suppl Fig. 1.

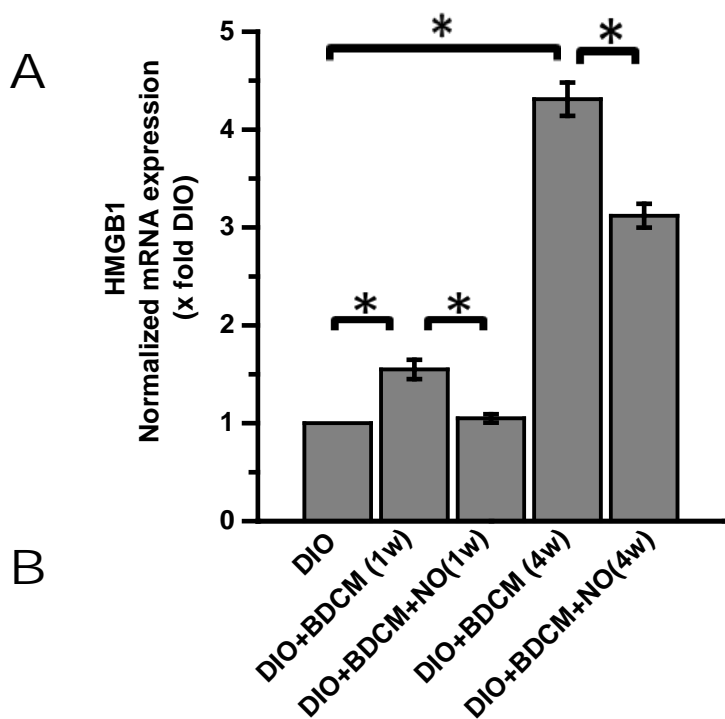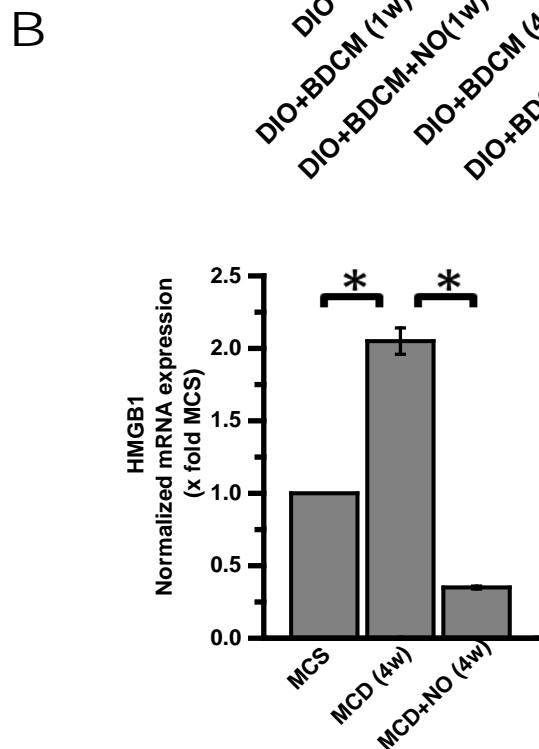

## Suppl Fig. 2.

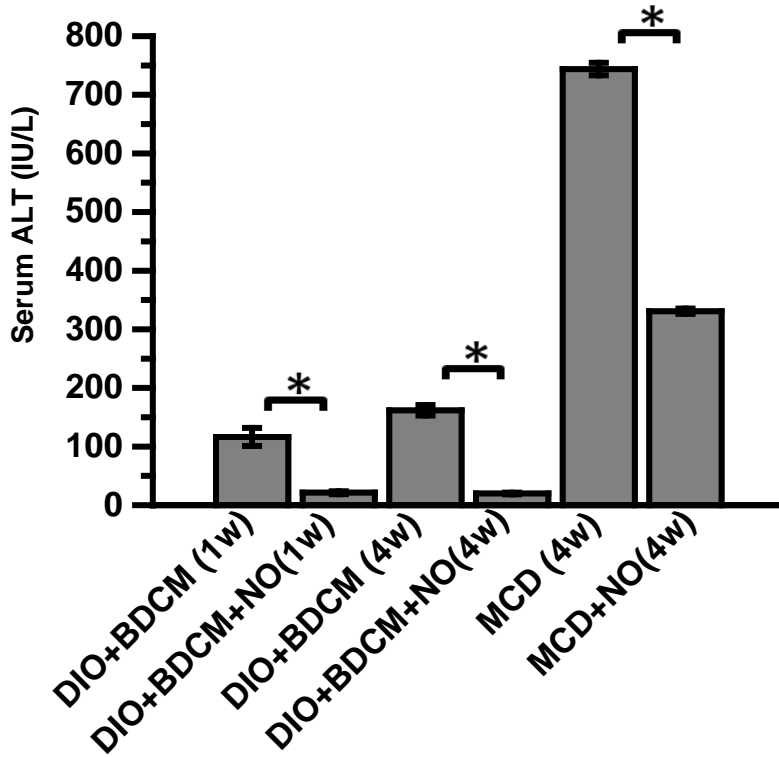

### Figure Legends of supplementary figures:

Suppl Fig. 1: HMGB1 Mrna expression in toxin and diet models of NASH. A. HMGB1 mrna expression profiles as measured my real time qRTPCR. All measurements were normalised Against DIO control. B. HMGB1 mrna expression in liver homogenates from diet model of NASH. MCS and MCD represent the control and NASH groups. \*  $P < 0.05$ .

Suppl Fig. 2: NO donor administration decrease liver injury. Serum ALT levels were measured in Liver homogenates from both the toxin model and dieatary model of NASH. Results are shown In international units/liter. . \*  $P < 0.05$ .
